# Supplementary material for: High-performance nickel cobalt sulfide materials via low-cost preparation for advanced asymmetric supercapacitors
Source: Royal Society of Chemistry journal article supplement (doi:10.1039/c6ra04462j), 2016-01-01
Supplement: c6ra04462j1.pdf [file c6ra04462j1.pdf]

**Electronic Supplementary Information**

**High-Performance Nickel Cobalt Sulfides Materials *via***

**Low-Cost Preparation for Advanced Asymmetric**

**Supercapacitors**

Shaolan Wang, Wei Li\*, Lipeng Xin, Ming Wu, Xiaojie Lou\*

*Multi-disciplinary Materials Research Center, Frontier Institute of Science and  
Technology, and State Key Laboratory for Mechanical Behavior of Materials, Xi'an  
Jiaotong University, Xi'an 710049, China*

E-mail addresses: [liwei03453@stu.xjtu.edu.cn](mailto:liwei03453@stu.xjtu.edu.cn), [xlou03@mail.xjtu.edu.cn](mailto:xlou03@mail.xjtu.edu.cn)

Table S1 Comparisons of electrochemical performance of the Ni-Co-S samples in our work and those in other papers on the nickel cobalt sulfides prepared using different preparation methods

| Electrode materials                                                                  | Preparation method     | Specific capacitance                               | Rate capability                       | Cycling stability                                |
|--------------------------------------------------------------------------------------|------------------------|----------------------------------------------------|---------------------------------------|--------------------------------------------------|
| Tube-like NiCo <sub>2</sub> S <sub>4</sub> <sup>1</sup>                              | Hydrothermal           | 1048 F g <sup>-1</sup> at 3 A g <sup>-1</sup>      | 50.1% (1-20 A g <sup>-1</sup> )       | 75.9% (5000 cycle at 10 A g <sup>-1</sup> )      |
| NiCo <sub>2</sub> S <sub>4</sub> nanotube arrays <sup>2</sup>                        | Hydrothermal           | 14.39 F cm <sup>-2</sup> at 5 mA cm <sup>-2</sup>  | 67.7% (5-150 mA c m <sup>-2</sup> )   | 92.0% (5000 cycle at 50 mA cm <sup>-2</sup> )    |
| NiCo <sub>2</sub> S <sub>4</sub> nanotube arrays <sup>3</sup>                        | Hydrothermal           | 738 F g <sup>-1</sup> at 4 A g <sup>-1</sup>       | 78% (4-32 A g <sup>-1</sup> )         | 93.4% (4250 cycle at 8 A g <sup>-1</sup> )       |
| Ni <sub>x</sub> Co <sub>1-x</sub> S <sub>2</sub> particles <sup>4</sup>              | Hydrothermal           | 1166 F g <sup>-1</sup> at 1 A g <sup>-1</sup>      | 47.9% (1-20 A g <sup>-1</sup> )       | 76.5%(1000 cycle at 5 A g <sup>-1</sup> )        |
| CoNi <sub>2</sub> S <sub>4</sub> nanoparticles <sup>5</sup>                          | Solvothermal           | 1169 F g <sup>-1</sup> at 1 A g <sup>-1</sup>      | 60.1% (1-5 A g <sup>-1</sup> )        | 49.03%(2000 cycle at 4 A g <sup>-1</sup> )       |
| Hierarchically Ni <sub>0.48</sub> Co <sub>0.52</sub> S <sub>1.097</sub> <sup>6</sup> | Solvothermal           | 1152 F g <sup>-1</sup> at 0.5 A g <sup>-1</sup>    | 69% (0.5-20 A g <sup>-1</sup> )       | Not Reported                                     |
| NiCo <sub>2</sub> S <sub>4</sub> hollow nanoprisms <sup>7</sup>                      | Sacrificial template   | 895.2 F g <sup>-1</sup> at 1 A g <sup>-1</sup>     | 65.4% (1-20 A g <sup>-1</sup> )       | 85.7% (1500 cycle at 5 A g <sup>-1</sup> )       |
| NiCo <sub>2</sub> S <sub>4</sub> nanotubes <sup>8</sup>                              | Sacrificial template   | 1093 F g <sup>-1</sup> at 0.2 A g <sup>-1</sup>    | 50.3% (0.2-5 A g <sup>-1</sup> )      | 63% (1000 cycle at 1 A g <sup>-1</sup> )         |
| NiCo <sub>2</sub> S <sub>4</sub> hollow hexagonal nanoplates <sup>9</sup>            | Sacrificial template   | 437 F g <sup>-1</sup> at 1 A g <sup>-1</sup>       | 53.2% (1-20 A g <sup>-1</sup> )       | 81% (1000 cycle at 2 A g <sup>-1</sup> )         |
| <b>Our work</b>                                                                      | <b>Coprecipitation</b> | <b>1259 F g<sup>-1</sup> at 1 A g<sup>-1</sup></b> | <b>75.07% (1-50 A g<sup>-1</sup>)</b> | <b>90.0% (2000 cycle at 10 A g<sup>-1</sup>)</b> |

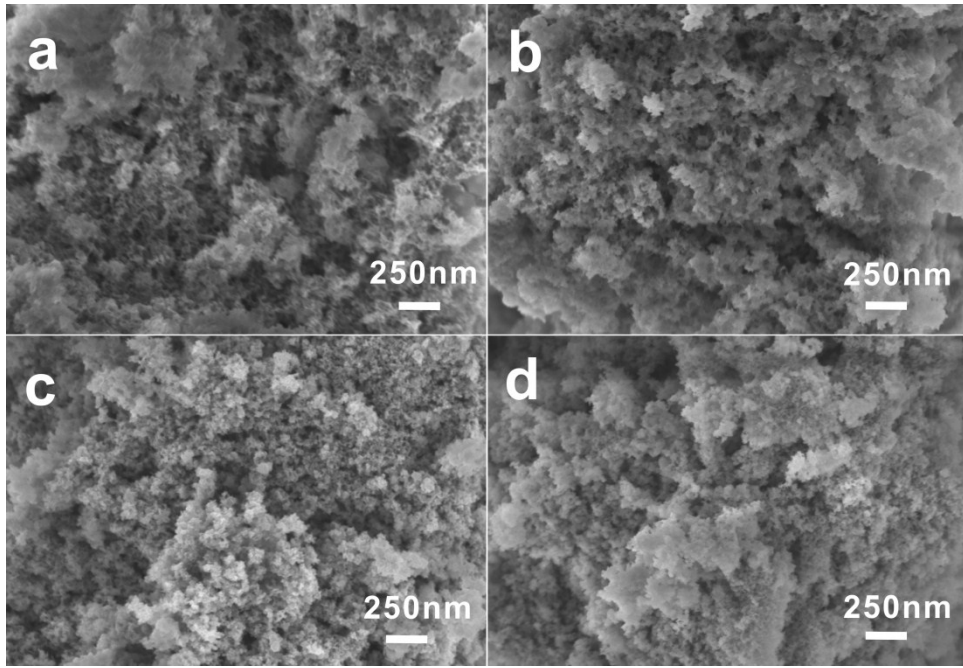

*Fig.S1 SEM images of the as-prepared NCS samples. (a) NCS-1 ;(b) NCS-2 ;(c) NCS-3;(d) NCS-5.*

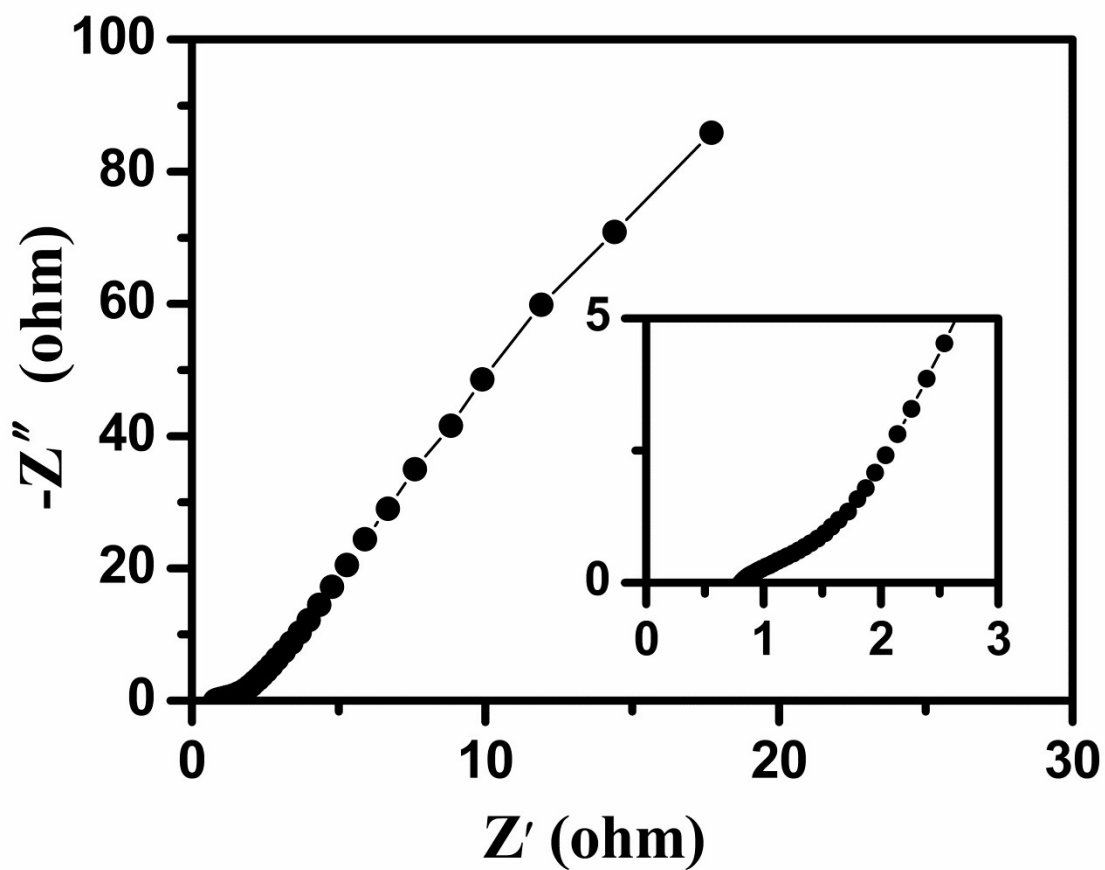

*Fig.S2 Nyquist plots of the NCS-4 sample measured at amplitude of 5 mV in the frequency region of 100 kHz to 0.01 Hz in the three-electrode cell.*

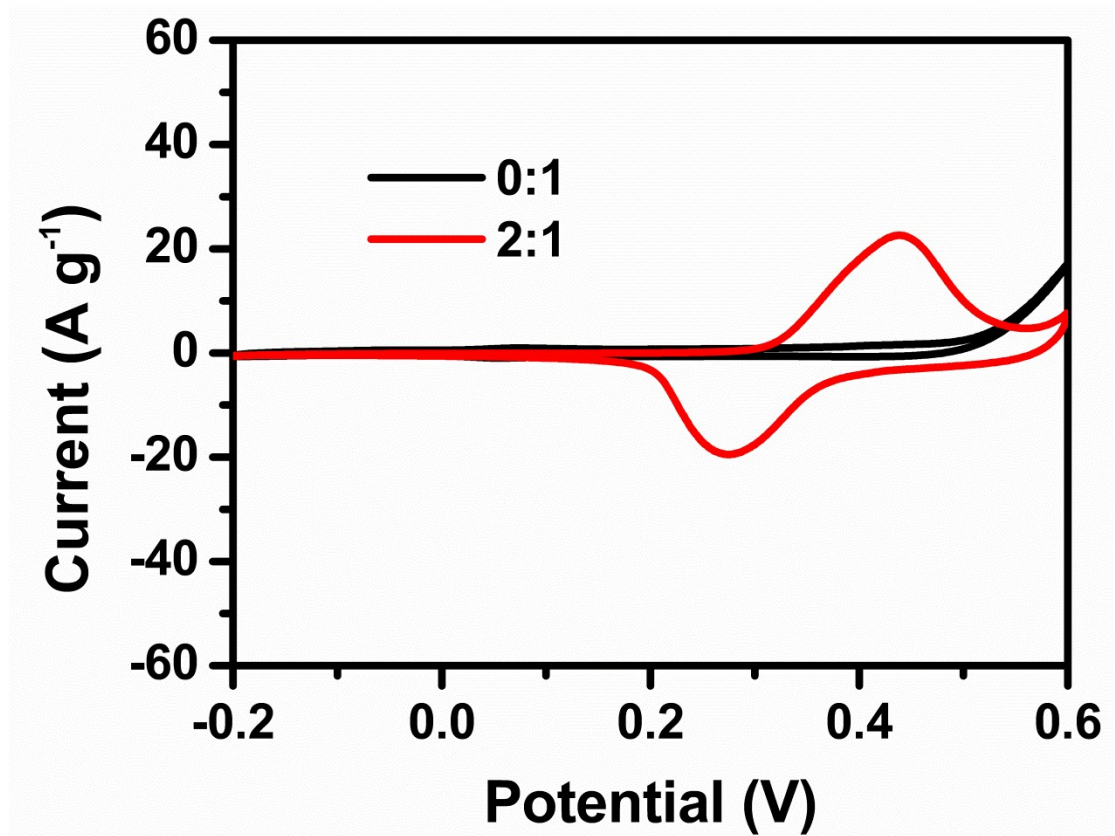

*Fig.S3 The CV curves of the pure Co-S phase and the NCS-4 sample at  $5 \text{ mV s}^{-1}$  in three-electrode cell.*

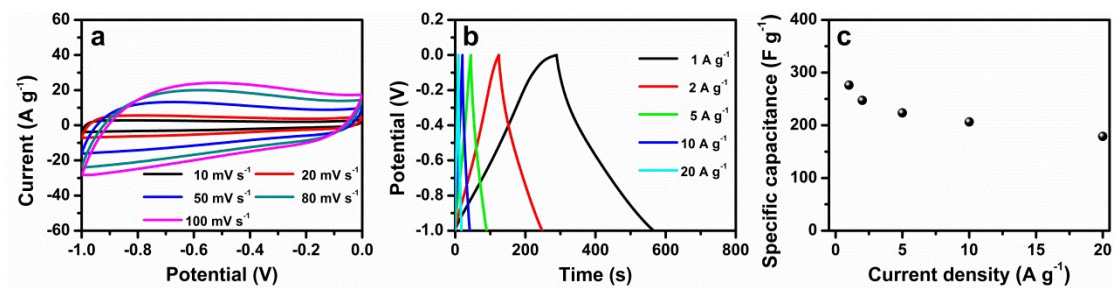

Fig.S4 Electrochemical evaluation of the activated carbon. (a) the CV curves under different scan rates; (b) the GCD curves under different current densities; (c) the specific capacitance versus different current densities.

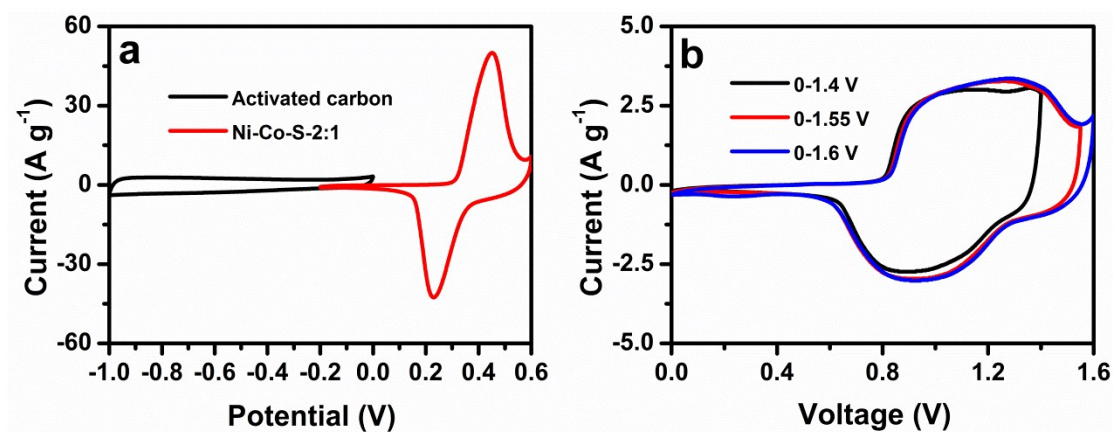

*Fig.S5 The voltage window evaluation of the asymmetric supercapacitor. (a) The CV curves of the activated carbon and NCS-4 at  $10 \text{ mV s}^{-1}$  respectively measured in three-electrode cell; (b) the CV curves of the NCS-4//AC asymmetric supercapacitors under different voltages.*

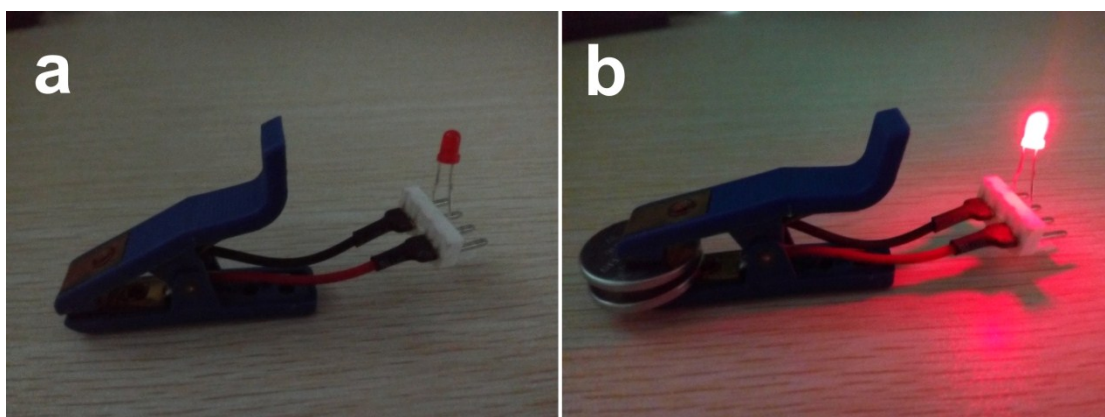

*Fig.S6 A photographs of the NCS-4//AC asymmetric supercapacitors powered a red LED. (a) Disconnection; (b) Connection.*



## References

1. M. M. Zhang Y, Yang J, et al., *Nanoscale*, 2014, **6**, 9824-9830.
2. H. Chen, J. Jiang, L. Zhang, D. Xia, Y. Zhao, D. Guo, T. Qi and H. Wan, *Journal of Power Sources*, 2014, **254**, 249-257.
3. J. Pu, T. Wang, H. Wang, Y. Tong, C. Lu, W. Kong and Z. Wang, *ChemPlusChem*, 2014, **79**, 577-583.
4. G. Li and C. Xu, *Carbon*, 2015, **90**, 44-52.
5. W. Du, Z. Zhu, Y. Wang, J. Liu, W. Yang, X. Qian and H. Pang, *Rsc Advances*, 2014, **4**, 6998.
6. Y. Gao, L. Mi, W. Wei, S. Cui, Z. Zheng, H. Hou and W. Chen, *ACS applied materials & interfaces*, 2015, **7**, 4311-4319.
7. L. Yu, L. Zhang, H. B. Wu and X. W. Lou, *Angew Chem Int Ed Engl*, 2014, **53**, 3711-3714.
8. H. Wan, J. Jiang, J. Yu, K. Xu, L. Miao, L. Zhang, H. Chen and Y. Ruan, *CrystEngComm*, 2013, **15**, 7649-7651.
9. J. Pu, F. Cui, S. Chu, T. Wang, E. Sheng and Z. Wang, *ACS Sustainable Chemistry & Engineering*, 2014, **2**, 809-815.
